# Supplementary material for: The 68Ga/177Lu-theragnostic concept in PSMA-targeting of metastatic castration–resistant prostate cancer: impact of post-therapeutic whole-body scintigraphy in the follow-up
Source: Springer Nature journal article supplement (doi:10.1007/s00259-019-04583-2), 2019-11-27
Supplement: MOESM1 [file 17439292]

**The <sup>68</sup>Ga / <sup>177</sup>Lu-Theranostic Concept in PSMA-Targeting  
of Metastatic Castration Resistant Prostate Cancer: Impact of Post-therapeutic Whole Body Scintigraphy in the Follow-Up**

Maffey-Steffan J.<sup>1\*</sup>, Scarpa L.<sup>1\*</sup>, Svirydenka A.<sup>1\*</sup>, Nilica B.<sup>1</sup>, Mair C.<sup>1</sup>, Buxbaum S.<sup>1</sup>, Bektic J.<sup>2</sup>, von Guggenberg E.<sup>1</sup>, Uprimny C.<sup>1</sup>, Horninger W.<sup>2</sup>, Virgolini I.<sup>1</sup>

Departments of <sup>1</sup>Nuclear Medicine and <sup>2</sup>Urology, Medical University of Innsbruck, 6020 Innsbruck, Austria.

\*the three authors contributed equally to the manuscript

Corresponding Author: Irene J. Virgolini, M.D., Director, Department of Nuclear Medicine, Medical University Innsbruck, Anichstraße 35, A-6020 Innsbruck, Tel: +43 (0)50 504 22650 or ext. 80935, FAX: +43 (0)50 504 22659, E-Mail: irene.virgolini@i-med.ac.at, http://nuklearmedizin-innsbruck.com

**Supplement 1: Demographic Data of Metastatic Resistant Prostate Cancer Patients**

| Patient | Age | Operations                         | Radiotherapy         | Chemotherapy           | Hormonal Therapy                                              | Supportive Therapy                        |
|---------|-----|------------------------------------|----------------------|------------------------|---------------------------------------------------------------|-------------------------------------------|
| 1       | 75  | prostatectomy, vesiculectomy       | EBRT                 | /                      | bicalutamide, degralix                                        | zoledronic acid ♦                         |
| 2       | 76  | prostatectomy                      | /                    | /                      | leuprorelin                                                   | /                                         |
| 3       | 82  | prostatectomy                      | proton therapy       | /                      | leuprorelin, enzalutamide                                     | denosumab ♦                               |
| 4       | 61  | /                                  | EBRT                 | docetaxel              | bicalutamide, degralix, dutasteride, enzalutamide             | 24.4 <sup>223</sup> Ra (MBq)              |
| 5       | 68  | /                                  | /                    | /                      | bicalutamide, leuprorelin                                     | /                                         |
| 6       | 63  | prostatectomy                      | EBRT                 | /                      | abiraterone, leuprorelin                                      | 18.1 <sup>223</sup> Ra (MBq), denosumab ♦ |
| 7       | 74  | prostatectomy, decompression L4/L5 | /                    | /                      | gosereline, enzalutamide                                      | zoledronic acid ♦                         |
| 8       | 59  | prostatectomy                      | /                    | docetaxel              | bicalutamide, tamoxifen, abiraterone, enzalutamide            | zoledronic acid, denosumab ♦              |
| 9       | 56  | /                                  | /                    | docetaxel              | degarelix, pamoreline, leuprorelin                            | 26.3 <sup>223</sup> Ra (MBq), denosumab   |
| 10      | 67  | prostatectomy, vesiculectomy       | /                    | docetaxel              | triptoreline, leuprorelin                                     | denosumab                                 |
| 11      | 89  | prostatectomy, vesiculectomy       | EBRT                 | docetaxel              | enzalutamide, abiraterone                                     | denosumab                                 |
| 12      | 68  | /                                  | /                    | docetaxel              | enzalutamide, abiraterone, leuprorelin, bicalutamide          | denosumab                                 |
| 13      | 59  | /                                  | /                    | docetaxel              | bicalutamide, leuprorelin, triptorelin                        | denosumab                                 |
| 14      | 91  | /                                  | EBRT                 | docetaxel              | enzalutamide, abiraterone, bicalutamide, gosereline, degralix | denosumab ♦                               |
| 15      | 81  | prostatectomy                      | EBRT                 | docetaxel              | enzalutamide, abiraterone, bicalutamide, gosereline, degralix | denosumab                                 |
| 16      | 60  | prostatectomy, vesiculectomy       | /                    | docetaxel              | abiraterone                                                   | /                                         |
| 17      | 80  | /                                  | EBRT                 | /                      | enzalutamide, abiraterone                                     | /                                         |
| 18      | 73  | prostatectomy, vesiculectomy       | /                    | docetaxel              | abiraterone, degralix, triptoreline                           | 24.76 <sup>223</sup> Ra (MBq)             |
| 19      | 75  | /                                  | /                    | docetaxel              | enzalutamide, degralix, leuprorelin                           | denosumab                                 |
| 20      | 60  | prostatectomy, vesiculectomy       | EBRT                 | /                      | abiraterone, bicalutamide, gosereline                         | alendronic acid, denosumab ♦              |
| 21      | 82  | /                                  | EBRT                 | docetaxel              | enzalutamide, bicalutamide, leuprorelin, degralix             | /                                         |
| 22      | 75  | /                                  | EBRT                 | /                      | /                                                             | /                                         |
| 23      | 71  | prostatectomy, vesiculectomy       | EBRT                 | docetaxel              | enzalutamide, bicalutamide, leuprorelin                       | cannabis, denosumab                       |
| 24      | 69  | /                                  | /                    | docetaxel              | enzalutamide, leuprorelin                                     | denosumab                                 |
| 25      | 73  | palliative transurethral resection | EBRT, proton therapy | regional chemotherapy  | /                                                             | /                                         |
| 26      | 84  | prostatectomy, vesiculectomy       | salvage radiation    | docetaxel              | enzalutamide                                                  | 22.91 <sup>223</sup> Ra (MBq)             |
| 27      | 61  | prostatectomy                      | EBRT                 | docetaxel              | bicalutamide, enzalutamide, abiraterone, cyproteronacetate    | /                                         |
| 28      | 83  | prostatectomy, penectomy           | EBRT                 | docetaxel              | bicalutamide, leuprorelin, abirateronacetate                  | /                                         |
| 29      | 73  | /                                  | /                    | cabazitaxel, docetaxel | degarelix, trenantone, bicalutamide, tamoxifen                | /                                         |
| 30      | 50  | /                                  | /                    | cisplatin/etoposide    | bicalutamide, leuprorelin, leuprorelinacetate                 | denosumab                                 |
| 31      | 67  | prostatectomy                      | /                    | docetaxel, cabazitaxel | bicalutamide, leuprorelin, enzalutamide, abiraterone          | /                                         |
| 32      | 79  | prostatectomy                      | /                    | /                      | bicalutamide, enzalutamide, leuprorelin                       | denosumab ♦                               |

EBRT: External beam radiation therapy

♦ Therapy ongoing
