# Supplementary material for: The 68Ga/177Lu-theragnostic concept in PSMA-targeting of metastatic castration–resistant prostate cancer: impact of post-therapeutic whole-body scintigraphy in the follow-up
Source: Springer Nature journal article supplement (doi:10.1007/s00259-019-04583-2), 2019-11-27

**Supplement 4:** Correlation of SUV<sub>max</sub> and TU/BG ratios and PSA, and TU/BG ratios and PSA-values.

The Pearson's correlation coefficient was applied to compare the different response assessment criteria, but no correlation could be found between neither SUV<sub>max</sub> and TU/BG, SUV<sub>max</sub> and PSA, nor Tu/BG and PSA-values.

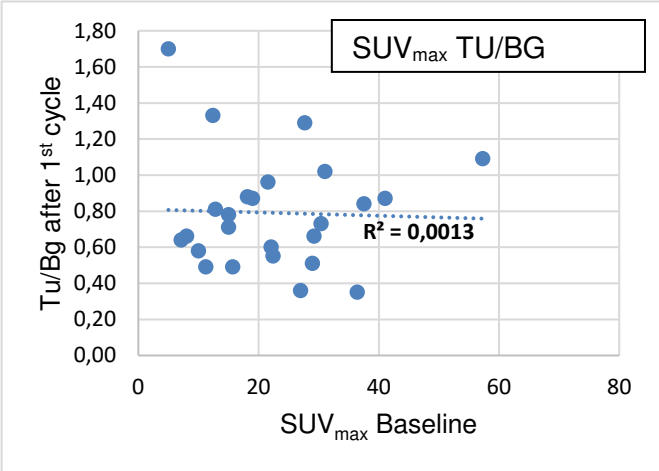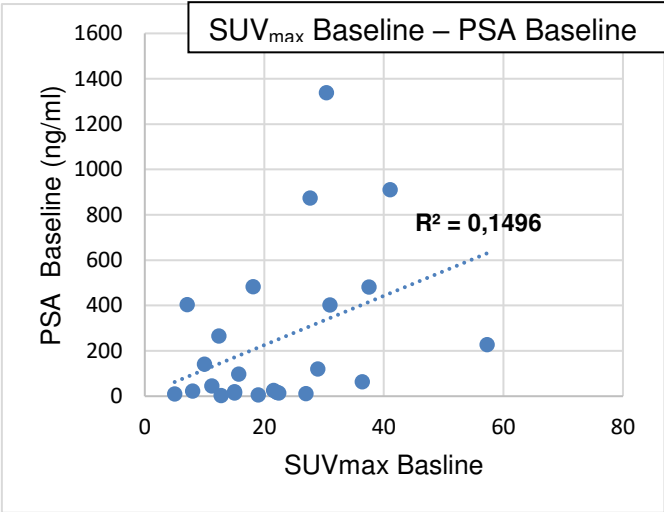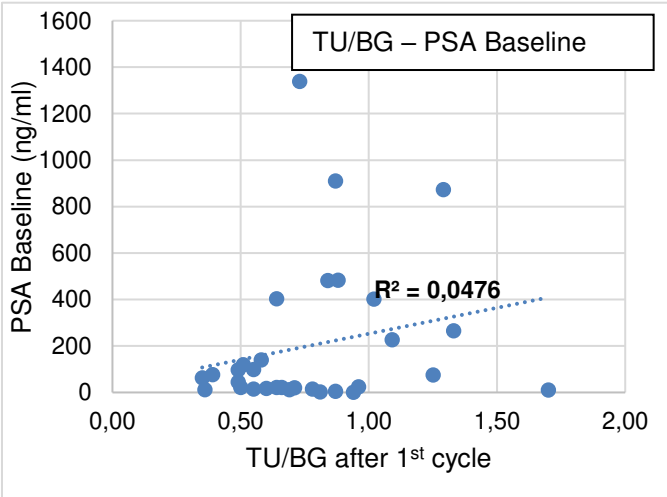

Supplement: MOESM4 [file 17439292]
