# Supplementary material for: The 68Ga/177Lu-theragnostic concept in PSMA-targeting of metastatic castration–resistant prostate cancer: impact of post-therapeutic whole-body scintigraphy in the follow-up
Source: Springer Nature journal article supplement (doi:10.1007/s00259-019-04583-2), 2019-11-27

**Supplement 5:** The Cox proportional hazards regression analysis was performed in order to evaluate if the covariates „SUV<sub>max</sub> at baseline“, „PSA values at baseline“ as well as „absorbed dose of skeletal metastases“ have a significant influence on OS. For our cohort, the Chi-squared test of the log-likelihood ratio, which tries to evaluate if the model in use differs from a simpler model without influence of the covariates, led to a probability larger than 0.05. This indicates that the covariates deliver no significant information. Furthermore, the p-values of the regression coefficients also indicated that none of the variables has an impact on OS.

Test of the null hypothesis H0: beta=0:

| Statistic          | DF | Chi-Square  | Pr > Chi <sup>2</sup> |
|--------------------|----|-------------|-----------------------|
| -2 Log(Likelihood) | 3  | 2,81381802  | 0,421                 |
| Score              | 3  | 3,309806612 | 0,346                 |
| Wald               | 3  | 3,096493053 | 0,377                 |

Regression coefficients:

| Variable                          | Value | Standard error | Wald-Chi-Square | Pr > Chi <sup>2</sup> | Hazard ratio | Hazard ratio lower boundary (95%) | Hazard ratio upper boundary (95%) |
|-----------------------------------|-------|----------------|-----------------|-----------------------|--------------|-----------------------------------|-----------------------------------|
| absorbed dose skel. Met. [Gy/GBq] | 0,077 | 0,093          | 0,685           | 0,408                 | 1,080        | 0,900                             | 1,297                             |
| PSA baseline                      | 0,000 | 0,001          | 0,263           | 0,608                 | 1,000        | 0,999                             | 1,002                             |
| SUVmax baseline                   | 0,019 | 0,022          | 0,724           | 0,395                 | 1,019        | 0,976                             | 1,065                             |

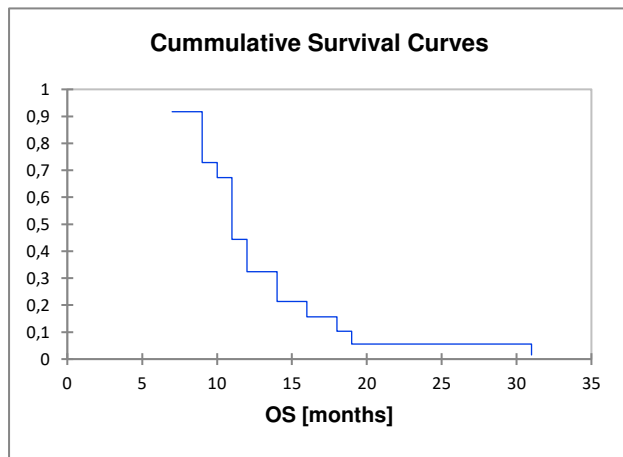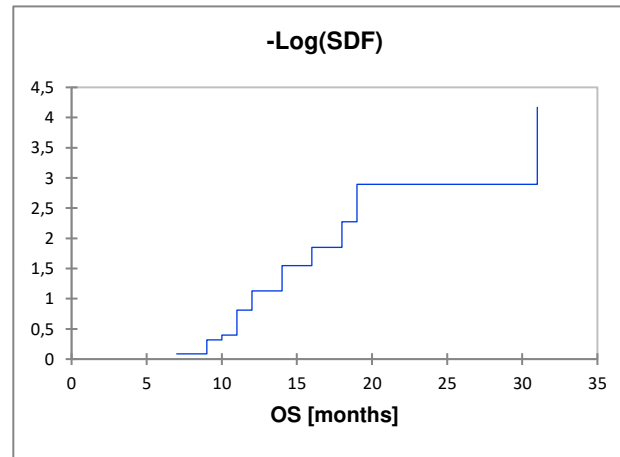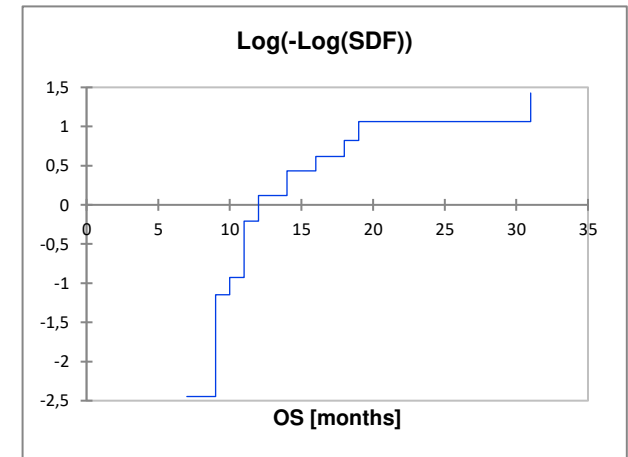

Supplement: MOESM5 [file 17439292]
