# Supplementary material for: The 68Ga/177Lu-theragnostic concept in PSMA-targeting of metastatic castration–resistant prostate cancer: impact of post-therapeutic whole-body scintigraphy in the follow-up
Source: Eur J Nucl Med Mol Imaging. 2019 Nov 27;47(3):695–712. doi: 10.1007/s00259-019-04583-2 (PMC7005064; doi:10.1007/s00259-019-04583-2)
Supplement: Supplementary file 3 — (PDF 798 KB) [file 259_2019_4583_MOESM3_ESM.pdf]

### Supplement 3: ECOG Evaluation

|                                                                                                      | Cycles |    |    |    |    |    |
|------------------------------------------------------------------------------------------------------|--------|----|----|----|----|----|
| Patient                                                                                              | 1.     | 2. | 3. | 4. | 5. | 6. |
| 1                                                                                                    | 0      | 0  | 0  |    |    |    |
| 2                                                                                                    | 0      | 0  | 0  | 0  |    |    |
| 3                                                                                                    | 0      | 0  | 0  | 1  |    |    |
| 4                                                                                                    | 0      | 0  | 0  |    |    |    |
| 5                                                                                                    | 0      | 0  | 0  | 0  |    |    |
| 6                                                                                                    | 0      | 1  | 0  | 0  |    |    |
| 7                                                                                                    | 0      | 0  | 1  |    |    |    |
| 8                                                                                                    | 0      | 0  |    |    |    |    |
| 9                                                                                                    | 0      | 0  | 0  |    |    |    |
| 10                                                                                                   | 0      | 0  | 0  | 0  | 0  | 0  |
| 11                                                                                                   | 0      | 0  | 1  | 1  | 1  | 1  |
| 12                                                                                                   | 0      | 0  |    |    |    |    |
| 13                                                                                                   | 0      | 0  | 0  | 0  |    |    |
| 14                                                                                                   | 1      | 1  | 1  | 1  |    |    |
| 15                                                                                                   | 1      | 2  | 2  |    |    |    |
| 16                                                                                                   | 1      | 1  | 1  | 1  |    |    |
| 17                                                                                                   | 0      | 0  | 0  | 0  |    |    |
| 18                                                                                                   | 0      | 1  | 1  |    |    |    |
| 19                                                                                                   | 1      | 1  | 1  | 1  |    |    |
| 20                                                                                                   | 0      | 0  | 0  | 0  | 0  | 0  |
| 21                                                                                                   | 1      | 1  |    |    |    |    |
| 22                                                                                                   | 0      | 0  | 0  | 0  |    |    |
| 23                                                                                                   | 0      | 2  | 2  | 2  |    |    |
| 24                                                                                                   | 0      | 0  | 1  | 1  |    |    |
| 25                                                                                                   | 0      | 0  | 0  | 0  |    |    |
| 26                                                                                                   | 0      | 0  | 0  | 0  |    |    |
| 27                                                                                                   | 0      | 0  | 0  |    |    |    |
| 28                                                                                                   | 0      | 0  | 0  | 0  | 0  |    |
| 29                                                                                                   | 1      | 1  | 1  |    |    |    |
| 30                                                                                                   | 1      | 1  | 1  | 1  |    |    |
| 31                                                                                                   | 0      | 0  | 0  | 0  |    |    |
| 32                                                                                                   | 0      | 0  | 0  | 0  |    |    |
| 1. = Baseline Performance Status obtained before administration of the 1 <sup>st</sup> therapy cycle |        |    |    |    |    |    |
| 2. = Performance Status obtained 6-10 weeks after the 1 <sup>st</sup> cycle                          |        |    |    |    |    |    |
| 3. = Performance Status obtained 6-10 weeksafter the 2 <sup>nd</sup> cycle                           |        |    |    |    |    |    |
| 4. = Performance Status obtained 6-10 weeks after the 3 <sup>rd</sup> cycle                          |        |    |    |    |    |    |
| 5. = Performance Status obtained 6-10 weeksafter the 4 <sup>th</sup> cycle                           |        |    |    |    |    |    |
| 6. = Performance Status obtained 6-10 weeksafter the 5 <sup>th</sup> cycle                           |        |    |    |    |    |    |
